# Supplementary material for: Mapping mutations to the SARS-CoV-2 RBD that escape binding by different classes of antibodies
Source: Springer Nature journal article supplement (doi:10.1038/s41467-021-24435-8), 2021-07-07
Supplement: 41467_2021_24435_MOESM2_ESM.pdf [file 41467_2021_24435_MOESM2_ESM.pdf]

Editorial Note: This manuscript has been previously reviewed at another journal that is not operating a transparent peer review scheme. The manuscript was considered suitable for publication without further review at Nature Communications.
